# Supplementary material for: MAGNETOSPHERIC IONIZATION DENSITY PROFILES AND WHISTLER PROPAGATION.
Source: Hindawi journal article supplement (doi:10.1155/2023/2733234), 1967-01-01
Supplement: f1 [file 2733234.f1.pdf]

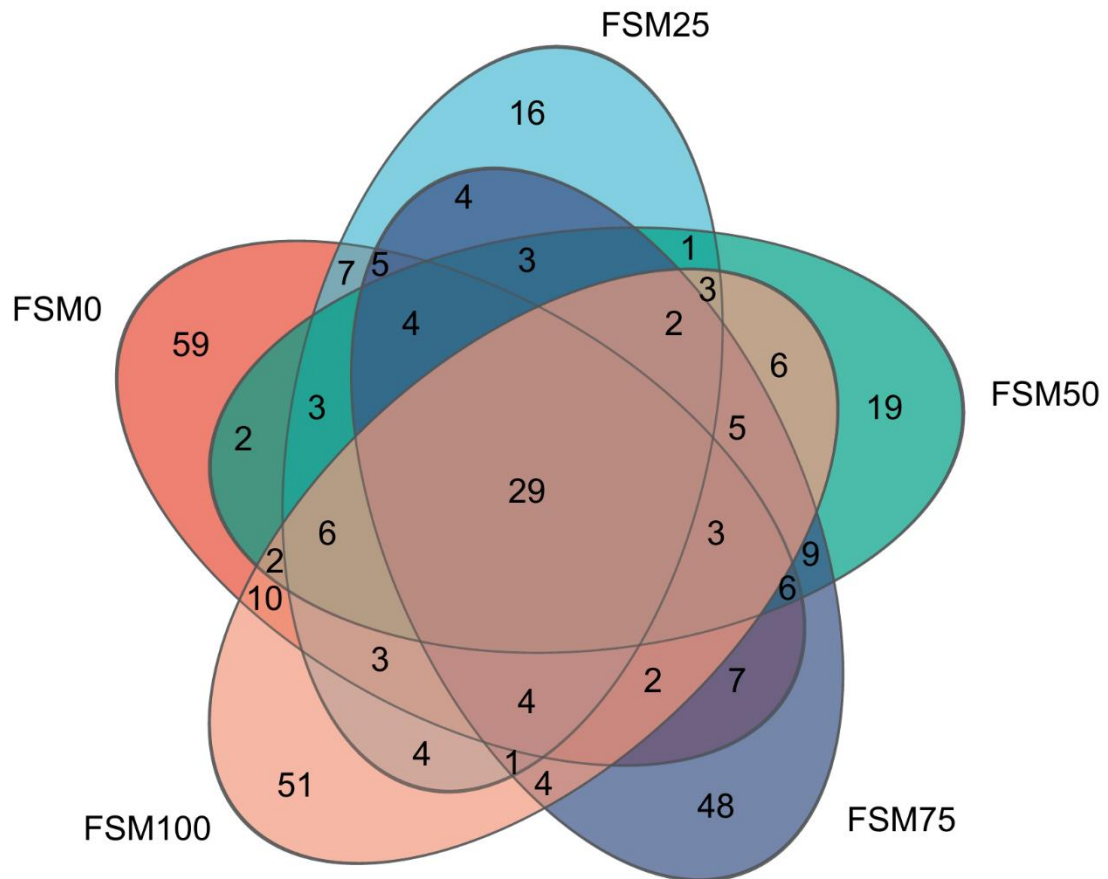

1

2 **Supplementary Figure 1.** The Venn diagram for intestinal microflora of large yellow  
 3 croaker on OTU level. FSM, fish steak meal.

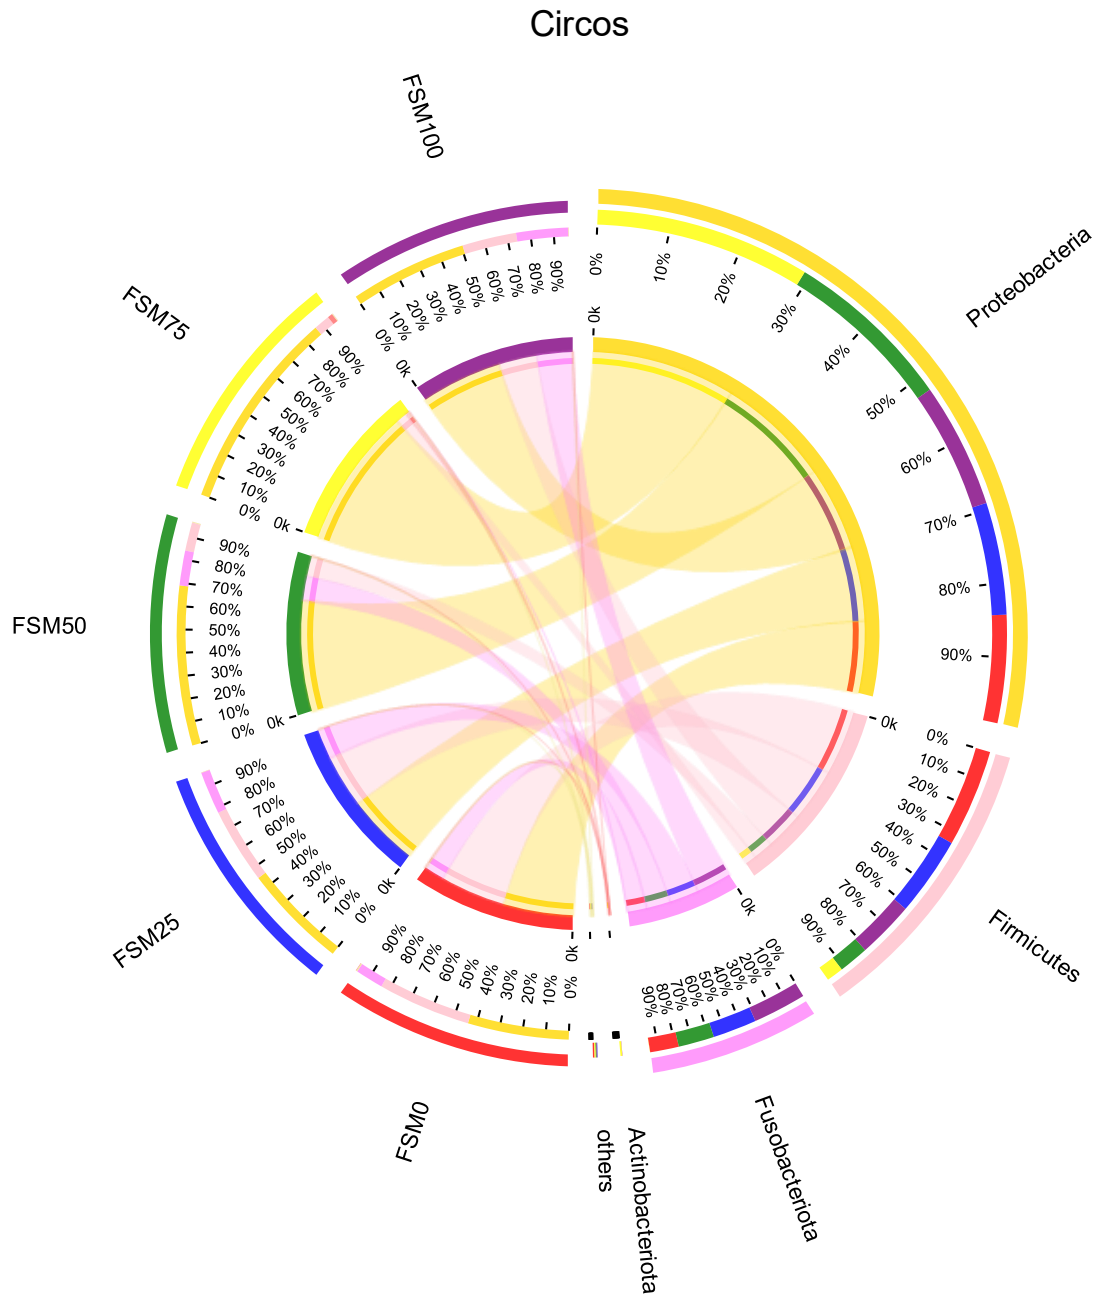

5

6 **Supplementary Figure 2.** Relative abundance of microbial community in intestine of  
 7 large yellow croaker on phylum level. FSM, fish steak meal.

### Cladogram

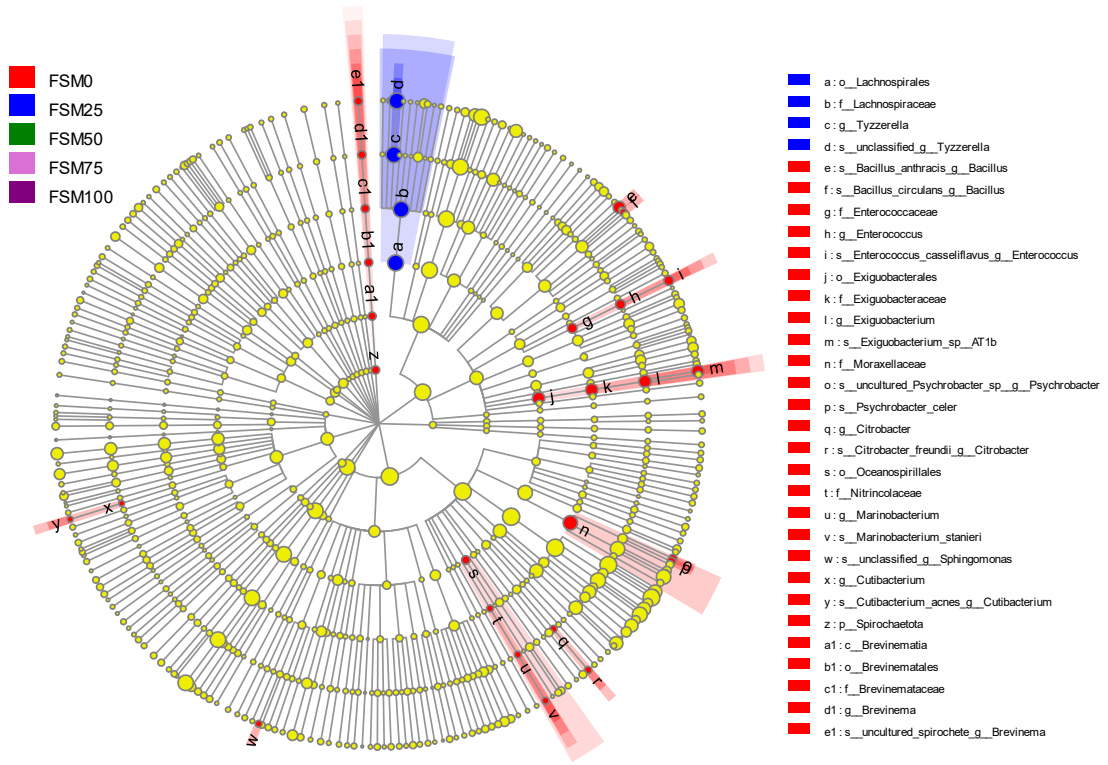

8

9 **Supplementary Figure 3.** LEfSe analysis identified the most differentially abundant  
 10 taxa among the five groups (n = 3/group). FSM, fish steak meal.
